# Supplementary material for: Propofol suppresses hormones levels more obviously than sevoflurane in pediatric patients with craniopharyngioma: A prospective randomized controlled clinical trial
Source: PLoS One. 2023 Jul 28;18(7):e0288863. doi: 10.1371/journal.pone.0288863 (PMC10381029; doi:10.1371/journal.pone.0288863)
Supplement: S1 Dataset — (XLS) [file pone.0288863.s004.xls]

## Sheet: T0
Case Number	GC（ug/ml)	TSH(uIU/ml)	FT3(pg/ml)	TT3(ng/ml)	FT4(ng/dl)	TT4(ng/ml)	ACTH（pg/ml)	FSH（mIU/ml)	LH（mIU/ml)	PRL（ng/ml)	GH（ng/ml)
47577	2.51	3.611	2.34	1.17	0.41	5.08	17.38	0.2	0.2	29.75	0.057
47713	0.76	0.89	2.03	1.05	0.68	8.49	5.4	0.2	0.2	37.09	0.164
47936	0.66	0.212	1.69	0.61	0.61	5.12	4.29	0.2	0.2	0.47	0.05
47910	8.37	0.942	2.63	0.98	0.83	7.14	52.67	6.4	5.55	11.6	0.069
47262	6.65	2.844	3.27	1.36	0.93	8.07	22.89	1.2	0.2	5.74	1.54
48040	1.12	3.953	1.3	0.54	0.3	1.96	12.73	0.2	0.2	3.25	0.05
48068	6.11	0.409	1.87	0.73	0.87	7.44	10.45	0.91	0.2	10.5	0.952
43443	0.4	2.318	2.13	1.06	0.59	5.53	10.11	0.25	0.2	11.68	0.05
48184	2.79	0.353	1.1	0.48	0.39	4.03	34.16	0.89	0.2	16.59	0.491
49735	3.78	1.754	3.05	1.13	0.73	6.85	38.04	0.94	0.25	38.31	1.59
49816	0.4	0.752	3.94	1.4	1.28	9.71	13.48	0.26	0.2	15.6	0.556
49866	2.44	1.941	2.83	0.99	0.68	5.34	14.03	0.31	0.2	72.87	0.053
49915	1.54	0.317	1.13	0.38	0.57	5.12	8.55	2.22	1.06	18.72	0.085
50247	25.82	0.933	2.3	0.9	0.68	6.62	11.51	1.95	0.2	2.71	1.35
50375	15.9	1.907	3.93	1.184	0.878	5.9596	30.2	1.27	0.2	3.54	1.986
50430	7.18	0.518	3.18	1.28	0.75	7.81	22.06	3.12	1.27	50.95	0.256
50467	15.44	2.158	2.54	0.82	0.7	5.42	41.86	0.26	0.72	23.3	0.171
50636	0.4	1.33	2.85	0.76	1.12	7.16	5.49	0.2	0.2	48.13	1.47
50613	5.61	2.325	3	1.18	0.92	8.98	28.98	3.63	0.8	16.43	0.394
50575	1.02	3.995	2.8	1.29	0.34	3.48	21.24	0.2	0.2	41.77	0.187
39123	0.4	0.987	2.88	0.92	1.12	9.32	3.59	0.2	0.2	0.66	0.05
50772	5.61	2.825	3	1.18	0.92	8.98	28.98	3.63	0.8	16.43	0.394
50748	0.169	1.987	3.23	1.284	0.848	5.9596	30.2	5.75	4.26	9.1	0.286
50878	1.02	0.051	3.15	1.19	0.73	8.17	16.19	0.2	0.2	40.38	0.05
50959	1.68	0.95	3.22	0.99	1.4	9.79	12.81	0.24	0.2	3.26	0.372
51113	9.13	1.124	3.51	1.02	1.36	9.79	23.08	0.24	0.2	5.2	1.21
51092	0.4	0.345	1.79	0.53	0.61	5.03	4.37	0.49	0.2	6.17	0.586
51126	0.4	0.587	2.66	1.09	1.17	7.88	10.96	0.2	0.2	22.22	0.05
51418	11.83	1.553	3.12	0.95	1.54	11.82	25.38	1.52	0.31	27.91	1.09
51501	4.1	1.198	2.07	0.92	0.82	6.23	24.8	2.27	0.2	9.2	0.472
51586	0.53	0.413	3	1.03	1.02	7.97	13.68	0.2	0.2	15.61	0.05
27059	0.4	0.191	1.04	0.28	0.89	4.82	4	0.25	0.2	7.24	0.05

## Sheet: T1
Case Number	GC（ug/ml)	TSH(uIU/ml)	FT3(pg/ml)	TT3(ng/ml)	FT4(ng/dl)	TT4(ng/ml)	ACTH（pg/ml)	FSH（mIU/ml)	LH（mIU/ml)	PRL（ng/ml)	GH（ng/ml)	IGF-1（ng/ml）
47577	8.75	0.199	2.03	0.6	1.2	7.55	1.45
47713	6.19	0.109	1.57	0.35	1.42	7.66	4.07
47936	0.4	0.025	1.51	0.36	1.6	8.45	2.72
47910	4.28	1.254	2.56	0.86	0.97	7.26	2.14
47262	2.08	1.868	2.41	0.72	0.94	5.64	3.19
48040	0.4	0.454	1.26	0.31	1.15	5.93	4.97
48068	3.72	0.372	1.8	0.51	1.2	7.66	1.22
43443	1.95	1.434	1.26	0.54	0.72	6.27	1.91
48184	2.28	0.034	0.88	0.26	0.8	4.94	3.85
49735	16.05	3.486	2.3	0.69	0.9	6.01	4.83
49816	12.86	3.42	2.08	0.49	1.58	8.15	3.42
49866	3.42	2.446	1.67	0.5	0.97	6.05	4.04
49915	0.51	0.374	0.97	0.28	0.75	4.9	2.04
50247	0.5	0.85	2.56	0.66	1.53	10.42	4.79
50375	0.61	1.015	2.4	0.73	1.45	11.14	1.5
50430	1.97	0.336	3.02	0.93	1.11	8.32	3.89
50467	0.4	0.657	1.65	0.4	1.4	6.7	3.04
50636	16.6	0.015	2.28	0.47	2.42	10.2	1
50613	9.16	0.351	2.22	0.74	1.2	9.81	2.53
50575	4.17	0.803	1.28	0.5	0.79	5.96	1.56
39123	15.41	0.011	2.53	0.59	1.87	11.02	1.94
50772	31.67	0.959	1.55	0.55	0.67	5.23	1.64
50748	0.56	3.128	2.13	0.49	1.47	7.08	3.32
50878	2.72	0.021	2.33	0.71	0.93	6.11	4.45
50959	2.29	0.005	2.71	0.67	1.94	9.88	3.25
51113	7.8	0.007	1.94	0.39	1.44	4.56	3.5
51092	5.19	0.124	1.42	0.3	1.39	4.69	2.46
51126	11.19	0.01	1.72	0.42	1.46	7.52	2.99
51418	0.48	0.529	1.96	0.43	1.59	8	3.99
51501	0.63	0.181	1.56	0.46	1.56	8.95	6.51
51586	1.6	0.371	1.81	0.49	1.15	6.12	4.64
27059	0.4	0.138	1.2	0.31	1.01	5.68	3.47

## Sheet: T2
Case Number	GC（ug/ml)	TSH(uIU/ml)	FT3(pg/ml)	TT3(ng/ml)	FT4(ng/dl)	TT4(ng/ml)	ACTH（pg/ml)	FSH（mIU/ml)	LH（mIU/ml)	PRL（ng/ml)	GH（ng/ml)	IGF-1（ng/ml）	ACTH（pg/ml)
47577	2.37	0.163	1.68	0.47	1.01	6.22	1.94
47713	1.29	0.118	1.26	0.28	1.51	6.88	2.64
47936	0.84	0.064	1.24	0.3	1.34	6.23	1.02
47910	25.9	3.482	2.96	0.85	1.1	7	1.64
47262	2.38	0.207	1.8	0.46	0.75	3.85	1.87
48040	0.49	0.172	1.06	0.27	1.03	5.46	2.06
48068	1.75	0.024	0.88	0.32	0.59	4.45	2.55
43443	0.74	1.343	1.17	0.46	0.69	5.14	7.29
48184	3.79	0.058	0.88	0.24	0.74	3.96	5.31
49735	2.27	0.688	1.31	0.42	0.8	7.43	20.17
49816	4.54	0.143	1.95	0.46	1.67	8.23	7.65
49866	5.35	1.037	1.7	0.51	0.92	6.23	27.35
49915	7.15	0.65	0.88	0.25	0.83	4.95	6.97
50247	2.18	0.147	2.43	0.6	1.35	8.82	5.22
50375	1.75	0.36	1.98	0.5	1.46	10.01	9.6
50430	5	0.303	2.95	0.87	1.03	8	10.12
50467	0.68	0.203	1.56	0.36	1.24	6.01	8.24
50636	9.48	0.058	1.88	0.37	2.1	7.26	1
50613	5.15	0.884	2.17	0.65	1.25	9.22	14.99
50575	3.47	0.802	1.08	0.43	0.77	5.91	6.55
39123	7.88	0.008	2.18	0.53	1.77	8.93	2.41
50772	13.47	0.536	1.25	0.43	0.59	4.62	2.8
50748	12.68	2.362	2.28	0.52	1.55	7.86	23.61
50878	0.72	0.111	2.01	0.73	0.77	6.28	10.77
50959	0.42	0.028	2.31	0.5	1.92	8.27	3.51
51113	1.55	0.033	1.79	0.38	1.35	4.55	4.08
51092	3.77	0.13	1.66	0.34	1.36	5.12	2.6
51126	3.6	0.007	1.59	0.39	1.28	6.35	2.93
51418	0.89	0.314	1.99	0.4	1.56	7.75	12.13
51501	7.1	0.178	1.79	0.47	2.2	13.53	26.46
51586	1.93	0.428	1.74	0.44	1.13	5.77	12.52
27059	0.66	0.113	1.11	0.25	0.93	5.17	8.72

## Sheet: T3
Case Number	Postoprative Hospital stay (Day)	GC（ug/ml)	TSH(uIU/ml)	FT3(pg/ml)	TT3(ng/ml)	FT4(ng/dl)	TT4(ng/ml)	ACTH（pg/ml)	FSH（mIU/ml)	LH（mIU/ml)	PRL（ng/ml)	GH（ng/ml)	Length of hospital stay
47577	11	2.59	0.31	1.59	0.48	0.97	6.55	1.83	0.2	0.2	9.86	0.05	22
47713	20	5.16	0.091	1.31	0.53	0.61	3.98	1.41	0.2	0.2	10.22	0.05	33
47936	21	3.81	0.068	1.52	0.39	0.89	6.91	1.76	0.2	0.2	1.93	0.05	26
47910	6	10.78	0.076	1.11	0.39	0.65	5.69	9.64	1.36	0.2	3.34	0.05	31
47262	5	0.99	0.046	0.98	0.43	0.45	4.79	1.04	0.2	0.2	0.57	0.77	36
48040	11	1.53	0.037	1.26	0.47	1.27	6.87	2.18	0.2	0.2	0.47	0.05	18
48068	14	4.37	0.08	1.61	0.31	1.07	5.97	2.99	0.2	0.2	3.04	0.476	19
43443	9	1.27	0.293	1.13	0.44	0.6	5.28	3.33	0.21	0.2	4.03	0.05	28
48184	77	2.71	0.076	1.2	0.37	0.78	5.05	2.1	0.53	0.2	0.47	0.164	87
49735	12	1.6	0.193	1.47	0.46	0.97	6.95	3.61	0.11	0.2	11.62	0.53	24
49816	5	7.12	0.019	1.31	0.42	0.9	6.9	1.58	0.2	0.2	3.75	0.278	16
49866	8	10.41	0.201	1.21	0.41	0.79	5.49	1.93	0.2	0.2	19.88	0.05	24
49915	15	3.69	0.027	1.17	0.44	1.22	6.03	3.27	0.2	0.2	5.27	0.05	19
50247	3	0.63	0.029	1.37	0.47	0.92	7.7	3.98	0.37	0.2	0.57	0.45	14
50375	9	7.92	0.053	1.54	0.6	0.68	7.22	2.16	0.57	0.2	0.47	0.662	17
50430	14	16.05	0.037	1.31	0.42	0.89	5.33	3.97	0.46	0.2	14.34	0.05	19
50467	13	11.34	0.03	1.65	0.48	1.05	5.94	1.7	0.2	0.2	9.1	0.05	20
50636	8	0.4	0.033	2.85	0.76	1.12	7.16	5.49	0.2	0.2	48.13	0.735	21
50613	4	0.69	0.384	1.46	0.64	0.91	8.93	6.29	0.78	0.2	4.57	0.197	17
50575	12	3.45	0.195	1.79	0.62	0.74	6.44	1.09	0.2	0.2	13.16	0.05	24
39123	23	0.4	0.01	1.45	0.42	0.89	4.66	1.1	0.2	0.2	0.47	0.05	33
50772	9	10.49	0.175	0.89	0.38	0.53	4.1	3.72	0.2	0.2	0.88	0.131	12
50748	14	1.09	0.034	1.39	0.33	1.1	5.26	5.45	1.29	0.2	2.26	0.05	30
50878	3	0.4	0.04	1.19	0.4	0.68	5.79	6.93	0.2	0.2	12.7	0.05	23
50959	5	4.92	0.005	0.91	0.29	0.66	5.48	4.86	0.2	0.2	0.91	0.05	18
51113	12	7.22	0.005	1.76	0.41	0.96	5.47	1.95	0.2	0.2	0.47	0.605	21
51092	12	0.4	0.011	1.48	0.31	1.39	7.52	1.07	1.69	0.2	1.46	0.293	31
51126	6	3.77	0.009	1.37	0.38	1.33	7.04	2.15	0.2	0.2	11.04	0.05	30
51418	9	0.86	0.037	1.73	0.43	1.34	8.77	2.29	0.2	0.2	20.12	0.411	20
51501	9	0.48	0.013	1.68	0.49	1.54	8.18	7.04	0.26	0.2	3.02	0.241	20
51586	5	0.4	0.18	0.88	0.2	0.96	5.34	4.35	0.41	0.2	7.92	0.05	20
27059	16	0.4	0.019	0.71	0.24	0.47	3.56	6.92	0.33	0.2	7.71	0.005	24

## Sheet: Statistic
Case Number	Age (Y)	Gender (Male1/Female2)	Highth (m)		Weight (kg)	BMI	Preoperative desmopressin replacement (Y1/N2)	First1/Recurrence2	Tumor volume (mm)	Length	Width	Height	Pathological diagnosis
47577	9	1	1.27	127	27	16.74	1	2	19*13*13	19	13	13	Adamantinomatous CP
47713	7	2	1.4	140	30	15.3061	1	2	90*87*64	90	87	64	Adamantinomatous CP
47936	6	2	0.95	95	16	17.7285	1	2	39*36*42	39	36	42	Adamantinomatous CP
47910	8	2	1.41	141	51	25.6526	2	1	64*62*55	64	62	55	Adamantinomatous CP
47262	5	1	1.1	110	18	14.876	2	1	44*38*30	44	38	30	Adamantinomatous CP
48040	8	2	1.26	126	22	13.8574	1	2	61*60*58	61	60	58	Adamantinomatous CP
48068	10	2	1.19	119	21	14.8295	1	2	25*18*15	25	18	15	Adamantinomatous CP
43443	9	2	1.55	155	68	28.3039	1	2	27*15*13	27	15	13	Adamantinomatous CP
48184	3	1	0.925	92.5	18	21.0373	2	1	73*69*67	73	69	67	Adamantinomatous CP
49735	8	1	1.29	129	32	19.2296	2	2	68*57*31	68	57	31	Adamantinomatous CP
49816	5	1	1.07	107	15	13.1016	1	2	17*14*9	17	14	9	Adamantinomatous CP
49866	12	2	1.56	156	68	27.9421	1	2	19*13*12	19	13	12	Adamantinomatous CP
49915	10	1	1.43	143	42	20.5389	2	2	80*57*40	80	57	40	Adamantinomatous CP
50247	3	2	0.93	93	13	15.0306	2	1	32*27*26	32	27	26	Adamantinomatous CP
50375	2	1	0.8	80	10	15.625	2	1	32*30*23	32	30	23	Adamantinomatous CP
50430	9	2	1.33	133	40	22.6129	1	2	17*15*15	17	15	15	Adamantinomatous CP
50467	14	1	1.49	149	46	20.7198	2	1	37*34*32	37	34	32	Adamantinomatous CP
50636	4	2	0.89	89	13	16.4121	1	1	23*16*15	23	16	15	Adamantinomatous CP
50613	9	2	1.67	167	55	19.721	2	1	22*18*15	22	18	15	Adamantinomatous CP
50575	12	1	1.63	163	54	20.3244	2	2	68*31*30	68	31	30	Adamantinomatous CP
39123	9	1	1.3	130	31	18.3432	1	2	47*40*32	47	40	32	Adamantinomatous CP
50772	5	2	1.1	110	18	14.876	2	1	44*34*32	44	34	32	Adamantinomatous CP
50748	14	1	1.58	158	58	23.2335	2	1	30*24*23	30	24	23	Adamantinomatous CP
50878	12	1	1.41	141	48	24.1437	1	2	16*13*12	16	13	12	Adamantinomatous CP
50959	6	1	1.1	110	20	16.5289	1	2	22*15*15	22	15	15	Adamantinomatous CP
51113	3	1	0.95	95	14	15.5125	1	2	30*22*21	30	22	21	Adamantinomatous CP
51092	13	2	1.49	149	39	17.5668	1	2	33*20*15	33	20	15	Adamantinomatous CP
51126	11	1	1.38	138	37	19.4287	1	2	34*22*21	34	22	21	Adamantinomatous CP
51418	12	1	1.58	158	44	17.6254	1	2	36*27*25	36	27	25	Adamantinomatous CP
51501	3	1	1.04	104	18	16.642	2	1	40*33*30	40	33	30	Adamantinomatous CP
51586	10	2	1.44	144	54	26.0417	1	2	32*27*21	32	27	21	Adamantinomatous CP
27059	15	1	1.62	162	61	23.2434	1	2	64*38*33	64	38	33	Adamantinomatous CP

## Sheet: Intraoperative Information
Case number	Length of operation (min)	BP of AIOR	SBP of AIOR	DBP of AIOR	MAP of AIOR	Peak BP	Peak SBP	Peak DBP	Peak MAP	BP of EO	SBP of EO	DBP of EO	MAP of EO	HR of AIOR	Peak HR	HR of EO	Allogeneic transfution (Y1/N2)	RBC	Plasma	Autologous RBC	Fluid infusion volume	Urine	Blood loss	Total fluid loss
47577	413	125/81	125	81	95.6667	128/65	128	65	86	124/61	124	61	82	99	103	96	1	400	0	200	3800	1400	450	1850
47713	891	94/65	94	65	74.6667	135/75	135	75	95	113/50	113	50	71	83	107	93	1	400	0	125	6425	3100	600	3700
47936	522	114/69	114	69	84	144/97	144	97	112.667	94/50	94	50	64.6667	70	101	75	1	400	100	125	4325	2500	350	2850
47910	427	110/68	110	68	82	138/72	138	72	94	109/57	109	57	74.3333	94	103	85	2	0	0	200	3300	1300	450	1750
47262	400	119/76	119	76	90.3333	118/67	118	67	84	95/40	95	40	58.3333	141	136	93	1	200	0	100	2630	1300	350	1650
48040	980	95/61	95	61	72.3333	147/98	147	98	114.333	102/45	102	45	64	69	108	65	1	600	200	125	5125	2200	800	3000
48068	383	93/61	93	61	71.6667	134/99	134	99	110.667	97/50	97	50	65.6667	83	123	84	1	600	200	250	4300	1000	950	1950
43443	451	107/65	107	65	79	153/88	153	88	109.667	137/70	137	70	92.3333	71	92	90	2	0	0	150	5350	2600	400	3000
48184	233	106/63	106	63	77.3333	115/70	115	70	85	106/69	106	69	81.3333	106	111	97	1	200	0	100	2450	1300	1150	2450
49735	571	103/64	103	64	77	128/74	128	74	92	123/55	123	55	77.6667	102	104	98	2	0	0	150	4600	2100	350	2450
49816	335	91/55	91	55	67	125/67	125	67	86.3333	117/51	117	51	73	65	105	70	1	400	100	125	2175	1100	300	1400
49866	404	111/69	111	69	83	170/87	170	87	114.667	165/58	165	58	93.6667	79	87	60	2	0	0	125	4300	1500	300	1800
49915	522	97/59	97	59	71.6667	151/97	151	97	115	113/62	113	62	79	56	83	92	2	0	0	125	4825	3600	400	4000
50247	390	88/53	88	53	64.6667	146/76	146	76	99.3333	100/44	100	44	62.6667	101	139	100	1	400	0	125	3175	1900	300	2200
50375	325	93/47	93	47	62.3333	123/63	123	63	83	109/46	109	46	67	120	138	85	1	200	0	0	1150	600	150	750
50430	290	97/55	97	55	69	144/86	144	86	105.333	117/66	117	66	83	86	109	93	2	0	0	125	2825	1900	300	2200
50467	395	101/74	101	74	83	155/102	155	102	119.667	112/61	112	61	78	71	85	80	2	0	0	125	4325	2000	250	2250
50636	280	111/65	111	65	80.3333	121/69	121	69	86.3333	97/49	97	49	65	78	101	69	1	200	0	100	2250	1300	250	1550
50613	275	111/62	111	62	78.3333	149/92	149	92	111	127/78	127	78	94.3333	60	70	88	2	0	0	0	2700	1400	250	1650
50575	405	111/64	111	64	79.6667	138/80	138	80	99.3333	119/63	119	63	81.6667	91	96	83	2	0	0	200	5900	3500	500	4000
39123	265	115/67	115	67	83	124/78	124	78	93.3333	117/72	117	72	87	107	122	120	1	400	0	0	2450	1100	300	1400
50772	358	105/60	105	60	75	120/60	120	60	80	98/51	98	51	66.6667	85	120	72	1	400	0	0	2950	1700	250	1950
50748	280	121/68	121	68	85.6667	177/89	177	89	118.333	163/74	163	74	103.667	62	146	72	2	0	0	200	3100	1600	400	2000
50878	370	104/67	104	67	79.3333	134/83	134	83	100	135/83	135	83	100.333	83	108	90	2	0	0	100	3000	1300	250	1550
50959	500	128/72	128	72	90.6667	139/82	139	82	101	120/50	120	50	73.3333	88	120	65	1	400	200	350	3200	1900	750	2650
51113	410	104/59	104	59	74	121/75	121	75	90.3333	103/47	103	47	65.6667	98	127	79	1	400	100	250	2700	1400	600	2000
51092	425	94/56	94	56	68.6667	137/74	137	74	95	91/41	91	41	57.6667	54	81	86	1	300	0	150	4750	3300	300	3600
51126	480	100/67	100	67	78	120/75	120	75	90	91/41	91	41	57.6667	85	84	62	1	400	0	200	3350	1000	500	1500
51418	530	132/88	132	88	102.667	172/118	172	118	136	144/79	144	79	100.667	84	116	99	1	200	0	250	4150	1900	550	2450
51501	352	87/51	87	51	63	105/63	105	63	77	101/41	101	41	61	79	99	92	1	200	0	80	1730	850	200	1050
51586	370	120/76	120	76	90.6667	149/83	149	83	105	123/65	123	65	84.3333	84	97	79	2	0	0	125	3025	1300	300	1600
27059	432	100/55	100	55	70	159/102	159	102	121	122/57	122	57	78.6667	72	107	52	2	0	0	0	6200	3600	300	3900
