# Supplementary material for: Propofol suppresses hormones levels more obviously than sevoflurane in pediatric patients with craniopharyngioma: A prospective randomized controlled clinical trial
Source: PLOS journal article supplement (doi:10.1371/journal.pone.0288863), 2023-07-28
Supplement: S3 (10.1371/journal.pone.0288863.s003) [file journal.pone.0288863.s003]

**Propofol suppresses hormones levels more obviously than sevoflurane in pediatric patients with craniopharyngioma: A prospective randomized controlled clinical trial**

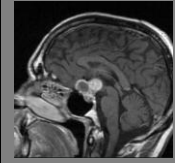

**Methods and Material**

Children with CP undergoing neurosurgery

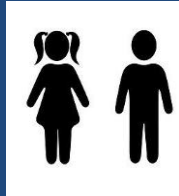

GA with sevoflurane and propofol respectively (n=32)

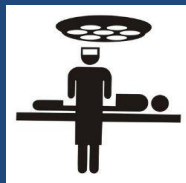

Evaluating hormones levels perioperatively

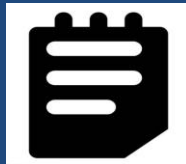

**Findings**

Hormones reduced by surgery and general anesthesia

**Propofol** affected hormones more obviously

**Thyroid hormone and ACTH** reduced significantly

**Limitation**

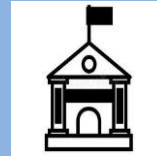

Single center trial

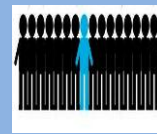

Small sample size

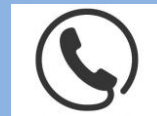

No long-term follow-up

**Conclusion:** Propofol and sevoflurane could reduce the levels of hormones intraoperatively and postoperatively in pediatric patients with craniopharyngioma, sevoflurane might be the preferred anesthetic because of less interruption on hormones levels
